# Supplementary figures and images for: Effects of interleukin-1 antagonism on cortisol levels in individuals with obesity: a randomized clinical trial
Source: PubMed Central journal article supplement — Endocr Connect. 2019 May 1;8(6):701–8. doi: 10.1530/EC-19-0201 (PMC6547405; doi:10.1530/ec-19-0201), 2019-05-01

A

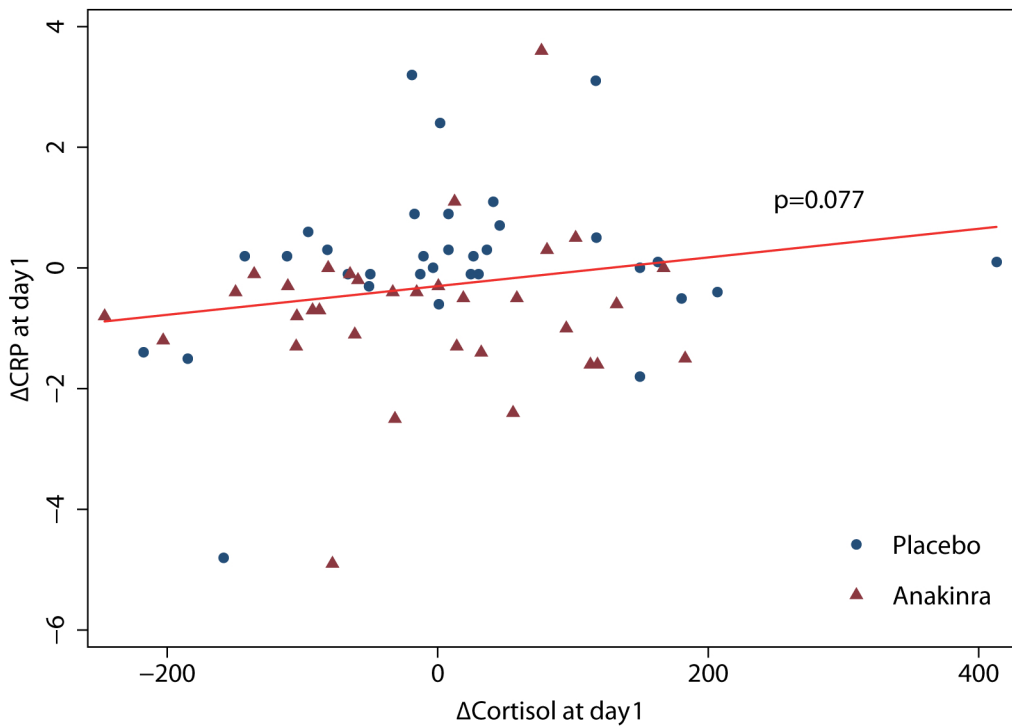

B

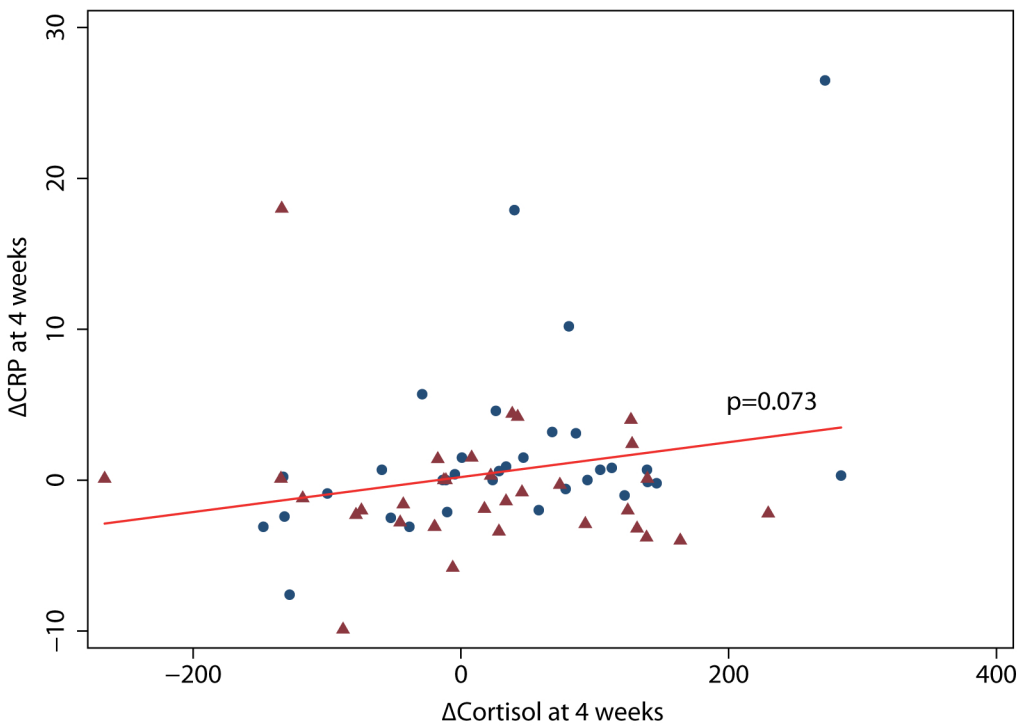

Supplement: supplementary_figure_1.pdf [file supplementary_figure_1.pdf]
